# Supplementary material
Source: MDPI journal article supplement (https://www.mdpi.com/2072-4292/15/5/1415)
Supplement: s1 [file s1 › remotesensing-2205298-supplementary.pdf]

# Modeling Soil CO<sub>2</sub> Efflux in a Subtropical Forest by Combining Fused Remote Sensing Images with Linear Mixed Effect Models

## Supplementary materials

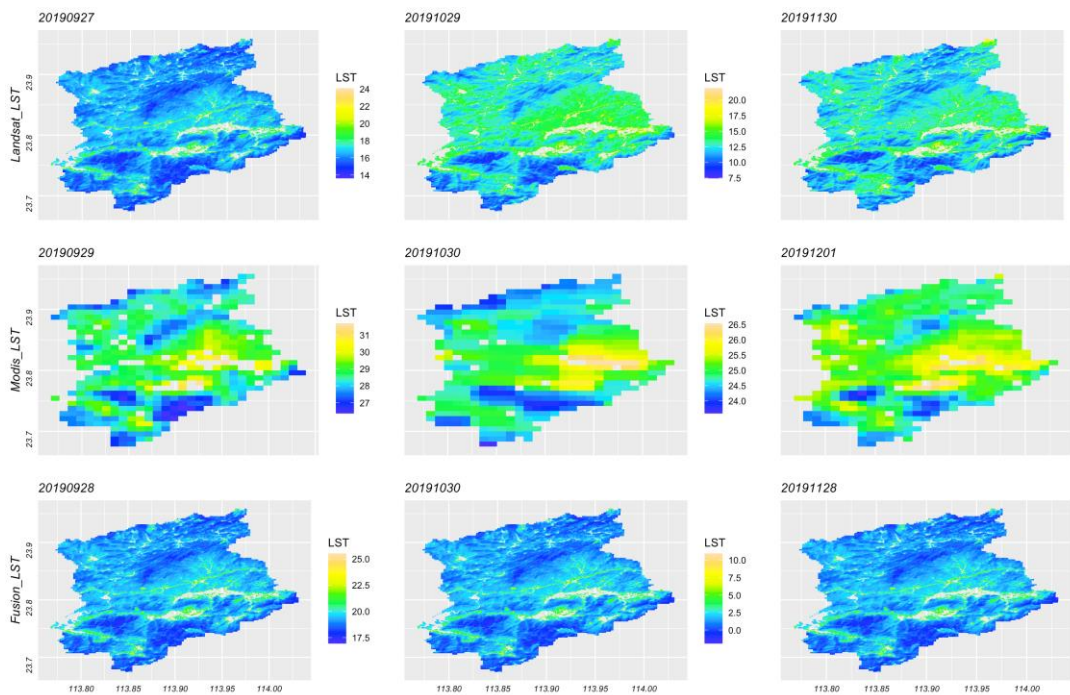

Figure S1 Spatial distribution of LST derived from multi source remote sensing images in different study periods of subtropical forests in dry seasons. First line is Landsat 8-LST, second line is MODIS-LST, third line is Landsat-MODIS Fusion-LST.

Table S1 Linear mixed effect of which Fusion-LST estimate grouped by month (random intercept effect) of observation was used to explain variability in soil FSCO<sub>2</sub> subtropical forests.

|                        |             |           |          |
|------------------------|-------------|-----------|----------|
| Random effect          |             |           |          |
| Groups                 | Name        | Variance  | Std.Dev. |
| month                  | (Intercept) | 0.042     | 0.205    |
| residual               |             | 0.037     | 0.193    |
| Fixed effect           | Estimate    | Std.Error | t-value  |
| (intercept)            | 0.535       | 0.10      | 5.335    |
| Fusion_LST             | -0.214      | 0.06      | -3.287   |
| Wald's chi-square test |             |           |          |
| Fusion_LST             | Chisq       | df        | p-value  |
|                        |             | 137.653   | 0.001 ** |

Table S2 Linear mixed effect of which Fusion-LST estimate grouped by season (random intercept effect) of observation was used to explain variability in soil FSCO<sub>2</sub> subtropical forests.

|                        |             |           |          |
|------------------------|-------------|-----------|----------|
| Random effect          |             |           |          |
| Groups                 | Name        | Variance  | Std.Dev. |
| season                 | (Intercept) | 0.028     | 0.168    |
| residual               |             | 0.053     | 0.229    |
| Fixed effect           | Estimate    | Std.Error | t-value  |
| (intercept)            | 0.477       | 0.104     | 4.588    |
| Fusion_LST             | -0.840      | 0.068     | -1.239   |
| Wald's chi-square test |             |           |          |
| Fusion_LST             | Chisq       | df        | p-value  |
|                        |             | 136.612   | 0.2176   |

Table S3 Linear mixed effect of which Fusion-LST estimate grouped by day (random intercept effect) of observation was used to explain variability in soil FSCO<sub>2</sub> subtropical forests.

|                        |             |           |          |
|------------------------|-------------|-----------|----------|
| Random effect          |             |           |          |
| Groups                 | Name        | Variance  | Std.Dev. |
| day                    | (Intercept) | 0.065     | 0.255    |
| residual               |             | 0.007     | 0.084    |
| Fixed effect           | Estimate    | Std.Error | t-value  |
| (intercept)            | 0.467       | 0.099     | 4.694    |
| Fusion_LST             | -0.129      | 0.159     | -0.812   |
| Wald's chi-square test |             |           |          |
| Fusion_LST             | Chisq       | df        | p-value  |
|                        |             | 52.763    | 0.42     |
